# Supplementary material for: Identification of novel variants in the LDLR gene in Russian patients with familial hypercholesterolemia using targeted sequencing
Source: PubMed Central journal article supplement — Biomed Rep. 2020 Nov 17;14(1):15. doi: 10.3892/br.2020.1391 (PMC7694592; doi:10.3892/br.2020.1391), 2020-11-17
Supplement: Supplementary_Data.pdf [file Supplementary_Data.pdf]

Table SI. Primers for PCR and subsequent Sanger sequencing.

| Gene, exon        | Detected variants                                                                                                                                                                   | Forward, 5'-3'             | Reverse, 5'-3'             | Tm | Fragment length |
|-------------------|-------------------------------------------------------------------------------------------------------------------------------------------------------------------------------------|----------------------------|----------------------------|----|-----------------|
| <i>LDLR</i> , 2   | c.100T>G p.(Cys34Gly)                                                                                                                                                               | CAGTTTCTGATT<br>CTGGCGTTG  | ATCATGCCCAA<br>AGGGGACTC   | 60 | 197             |
| <i>LDLR</i> , 4   | c.316_328delCCCAAGACGTGCT<br>p.(K107Rfs*95)<br>c.325T>G p.(Cys109Gly)<br>c.401G>C (p.Cys134Ser)<br>c.433_434dupG p.(Val145Glyfs*35)<br>c.552T>G p.(Cys184Trp)<br>c.616A>C (p.S206R) | CAGTGCTGGGA<br>AATGTGTACA  | CACCTAAATCA<br>CTGCATGTCC  | 60 | 664             |
| <i>LDLR</i> , 5   | c.798T>A p.(Asp266Glu)                                                                                                                                                              | CACACTCTGTC<br>CTGTTTTCCAG | AGAATGGGGGAT<br>GGAAAACCAG | 60 | 191             |
| <i>LDLR</i> , 6   | c.887G>A p.(Cys296Tyr)<br>c.888C>A p.(Cys296*)<br>c.938 G>A p.(Cys313Tyr)                                                                                                           | TGAATCCATTTG<br>CATGCGTT   | CTACAGCACTCA<br>TGTCTCAGT  | 60 | 308             |
| <i>LDLR</i> , 6   | spl Intron 6 c.940+1_<br>c.940+4 delGTGA<br>(g.18154_18157delGTGA)                                                                                                                  | ATGAGTGCCAA<br>GCAAACCTGA  | GGCAGAGTGGA<br>GTTCCCAA    | 58 | 285             |
| <i>LDLR</i> , 7   | c.986G>A p.(Cys329Tyr)<br>c.1048C>T p.(Arg350*)                                                                                                                                     | AGAGTGACCAG<br>TCTGCATCC   | ACTGAGGCATGA<br>GGGGTTTG   | 60 | 232             |
| <i>LDLR</i> , 8   | c.1186G>C p.(Gly396Arg)                                                                                                                                                             | CTCCGTCTCTAG<br>CCATTGGG   | ATGAAACTCCCC<br>CACCACTG   | 57 | 255             |
| <i>LDLR</i> , 8   | spl Intron 8 c.1186+1G>T                                                                                                                                                            | GTTGGGTTCCCCG<br>TGGTGAAT  | TGTCCCTGAAAG<br>GAAAGCCG   | 60 | 595             |
| <i>LDLR</i> , 9   | c.1202T>A p.(Leu401His)<br>c.1277 T>C (p.Leu426Pro)                                                                                                                                 | AGGCTAGCCTTA<br>TGCTCCTAG  | AGGAGCCCTCAT<br>CTCACCTG   | 60 | 464             |
| <i>LDLR</i> , 10  | c.1478_1479delCT<br>p.(Ser493Cysfs*42)                                                                                                                                              | GAATGATCTGCA<br>GGTGAGCG   | GTGGATACGCAC<br>CCATGAAC   | 58 | 338             |
| <i>LDLR</i> , 11  | c.1684_1691delTTGGCCCAA<br>p.(Pro563Hisfs*14)                                                                                                                                       | GGGGTTCCCAGC<br>AGGACTAT   | CTCTCCAATGGG<br>CAGGTAGG   | 62 | 285             |
| <i>LDLR</i> , 12  | c.1730G>C p.(Trp577Ser)<br>c.1775G>A p.(Gly592Glu)                                                                                                                                  | CAGCACGTGACC<br>TCTCCTTAT  | GCCACCTAAGTG<br>CTTGCATC   | 60 | 218             |
| <i>LDLR</i> , 15  | c.2230C>T p.(Arg744*)                                                                                                                                                               | TAGGCGCACACC<br>TATGAGAAG  | TCGTGACCAAAA<br>TGTTTCGTGG | 60 | 317             |
| <i>APOB</i> , 26  | c.9175C>T p.(Arg3059Cys)                                                                                                                                                            | TGTTCTCGTTGTT<br>TCCAGCAGA | GCATGGCACTGT<br>TTGGAGAAG  | 60 | 312             |
| <i>APOB</i> , 26  | c.10580G>A p.(Arg3527Gln)<br>c.10580G>T p.(Arg3527Leu)                                                                                                                              | ATATGCGTTGGA<br>GTGTGGCT   | ACCGTAAAGGA<br>GCAGTTGA    | 60 | 265             |
| <i>APOB</i> , 29  | c.13480_13482delCAG<br>p.(Gln4494del)                                                                                                                                               | TGACTGTGGTTG<br>ATTGCAGC   | CTTCTGCCACTG<br>CTCAGGA    | 58 | 238             |
| <i>ABCG5</i> , 10 | c.1336C>T p.(Arg446*)                                                                                                                                                               | CGAGTCCCCTA<br>GCTCCAT     | ACTGACTGTTCT<br>GAAACCTGC  | 58 | 237             |
| <i>ABCG8</i> , 7  | c.1083G>A p.(Trp361*)                                                                                                                                                               | CGAGGGGTGATC<br>AGCATTGT   | ATAGGGGTGTTCT<br>GTGTCGC   | 60 | 139             |
| <i>ABCG8</i> , 11 | c.1629G>T p.(Arg543Ser)                                                                                                                                                             | AGCCTCATCATC<br>ACCAGGAG   | GAAAGCAGGCTT<br>CATCCAGT   | 60 | 453             |
| <i>PCSK9</i> , 9  | c.1486C>T p.(Arg496Trp)                                                                                                                                                             | ACTGTATGGTCA<br>GCACACTCG  | CCTCTAGGAAAC<br>CCTTCCCG   | 60 | 361             |
| <i>LIPA</i> , 8   | c.894G>A p.(Q298=)                                                                                                                                                                  | ACATGAACCCCA<br>AATGCACTC  | TTGCACCTCCTTC<br>ATATGGAC  | 60 | 315             |

PCR reactions were performed with Taq AB PCR master-mix (Alkor Bio Group).

Table SII. Phenotypic characteristics of mutation-positive adult patients.

| A, Patients with mutations in the <i>LDLR</i> gene |     |     |                                                   |                |           |                |               |                                                              |             |
|----------------------------------------------------|-----|-----|---------------------------------------------------|----------------|-----------|----------------|---------------|--------------------------------------------------------------|-------------|
| Patient ID                                         | Age | Sex | Medical history of ASCVD                          | Family history | Xanthomas | Max TC, mmol/l | LDL-C, mmol/l | Mutation                                                     | Variant ID  |
| 27                                                 | 66  | F   | MI at the age of 57, CAD                          | Yes            | None      | 10             | Nd            | Missense Exon 2<br>c.100T>G<br>p.(Cys34Gly)                  | rs879254405 |
| 1                                                  | 56  | F   | MI at the age of age 53                           | Yes            | Yes       | 10.3           | Nd            | Frameshift Exon 4<br>c.433_434dupG<br>p.(Val145Glyfs*35)     | Novel       |
| 33                                                 | 29  | F   | No                                                | Yes            | Yes       | 10.8           | 8.6           | Missense Exon 5<br>c.798T>A<br>p.(Asp266Glu)                 | rs139043155 |
| 60                                                 | 36  | F   | Increased IMT                                     | Yes            | Yes       | 12             | 8.5           | Missense Exon 6<br>c.887G>A<br>p.(Cys296Tyr)                 | rs879254707 |
| 9                                                  | 31  | M   | CAD from the age of 29                            | Yes            | Yes       | 10.3           | Nd            | Nonsense Exon 6<br>c.888C>A<br>p.(Cys296*)                   | rs879254708 |
| 38                                                 | 43  | M   | Increased IMT                                     | Yes            | Yes       | 11.9           | 7.5           | Missense Exon 7<br>c.986G>A<br>p.(Cys329Tyr)                 | rs761954844 |
| 39                                                 | 67  | F   | Carotid artery stenosis, 30%-40%                  | Yes            | Yes       | 14.7           | 12            | Missense Exon 7<br>c.986G>A<br>(p.Cys329Tyr)                 | rs761954844 |
| 45                                                 | 36  | M   | Increased IMT                                     | Yes            | Yes       | 13.5           | 10.9          | Nonsense Exon 7<br>c.1048C>T<br>p.(Arg350*)                  | rs769737896 |
| 32                                                 | 29  | M   | Anterior descending artery stenosis, 30%          | No             | Yes       | 9.7            | 8.5           | Missense Exon 8<br>c.1186G>C<br>p.(Gly396Arg)                | Novel       |
| 59                                                 | 32  | F   | Carotid artery stenosis, 30%-40%                  | No             | Yes       | 16             | Nd            | Missense Exon 9<br>c.1202T>A<br>p.(Leu401His)                | rs121908038 |
| 35                                                 | 42  | M   | Hypertension                                      | Yes            | Yes       | 9.8            | 7.7           | Frameshift Exon 10<br>c.1478_1479delCT<br>p.(Ser493Cysfs*42) | rs869025453 |
| 36 <sup>a</sup>                                    | 70  | F   | MI at the age of 55, CAD                          | Yes            | Yes       | 12             | Nd            | Missense Exon 12<br>c.1775G>A<br>p.(Gly592Glu)               | rs137929307 |
| 69                                                 | 49  | M   | MI at the age of 47, carotid artery stenosis, 50% | Yes            | None      | 10.7           | Nd            | Nonsense Exon 15<br>c.2230C>T<br>p.(Arg744*)                 | rs200793488 |
| B, Patients with mutations in the <i>APOB</i> gene |     |     |                                                   |                |           |                |               |                                                              |             |
| 30                                                 | 39  | F   | Carotid artery stenosis 30%-40%                   | No             | None      | 11.2           | 9.8           | In-frame deletion<br>c.13480_13482delCAG<br>p.(Gln4494del)   | rs562574661 |
| 31                                                 | 65  | F   | CAD, hypertension                                 | No             | None      | 17             | 9             | In-frame deletion<br>c.13480_13482delCAG<br>p.(Gln4494del)   | rs562574661 |
| 58                                                 | 59  | F   | MI at the age of 56                               | No             | Yes       | 12.9           | Nd            | c.10580G>T<br>p.(Arg3527Leu)                                 | rs5742904   |

Table SII. Continued.

| C, Patients with mutation in the <i>ABCG5/ABCG8</i> genes               |     |     |                                                                                   |                |           |                |               |                                                          |             |
|-------------------------------------------------------------------------|-----|-----|-----------------------------------------------------------------------------------|----------------|-----------|----------------|---------------|----------------------------------------------------------|-------------|
| Patient ID                                                              | Age | Sex | Medical history of ASCVD                                                          | Family history | Xanthomas | Max TC, mmol/l | LDL-C, mmol/l | Mutation                                                 | Variant ID  |
| 18                                                                      | 50  | F   | MI at the age of 47, obesity, hypertension, stable angina                         | Yes            | Yes       | 9.9            | 6.1           | Nonsense <i>ABCG5</i> c.1336C>T p.(Arg446*) <sup>b</sup> | rs199689137 |
| 2                                                                       | 36  | M   | CAD, MI (age 30), hypertension, obesity, fatty liver disease acanthosis nigricans | Yes            | None      | Nd             | Nd            | Missense Ex11 <i>ABCG8</i> c.1629G>T p.(Arg543Ser)       | rs201690654 |
| D, Patient with variant in the <i>PSCK9</i> gene (unknown significance) |     |     |                                                                                   |                |           |                |               |                                                          |             |
| Patient ID                                                              | Age | Sex | Medical history of ASCVD                                                          | Family history | Xanthomas | Max TC, mmol/l | LDL-C, mmol/l | Mutation                                                 | Variant ID  |
| 70                                                                      | 47  | F   |                                                                                   | No             | None      | Nd             | Nd            | c.436G>A p.(Asp146Asn)                                   | Novel       |

ASCVD, atherosclerotic cardiovascular disease; CAD, coronary artery disease; HC, hypercholesterolemia; IMT, intima-media thickness; LDL-C, low density lipoprotein cholesterol; MI, myocardial infarction; Nd, no data; TC, total cholesterol. <sup>a</sup>Patient also had a *ABCG8* c.1921G>A variant p.(Ala641Thr) of uncertain significance, which was found in the Northwest Russia 694 exomes dataset with a minor allele frequency  $2.8 \times 10^{-3}$  (GnomAD AF  $10^{-3}$ ). <sup>b</sup>The *ABCG5* c.1336C>T p.(Arg446\*) variant was found in the Northwest Russia 694 exomes dataset (19) with MAF  $9.5 \times 10^{-4}$  (GnomAD AF  $1.8 \times 10^{-4}$ ).

Table SIII. Phenotypic characteristics of mutation-positive patients from the children/adolescent group.

| A, Patients with mutations in the <i>LDLR</i> gene |     |     |                                                                                     |                |           |            |               |                                                             |                           |
|----------------------------------------------------|-----|-----|-------------------------------------------------------------------------------------|----------------|-----------|------------|---------------|-------------------------------------------------------------|---------------------------|
| Patient ID                                         | Age | Sex | Medical history if available                                                        | Family history | Xanthomas | TC, mmol/l | LDL-C, mmol/l | Mutation                                                    | Variant ID                |
| G29                                                | 11  | F   | HC firstly detected in 9                                                            | HC             | No        | 11         | 9.1           | Missense Exon 4 c.325T>G p.(Cys109Gly)                      | Novel                     |
| G36                                                | 7   | F   | Examination due to family history                                                   | HC             | No        | Nd         | 11.6          | Missense Exon4 c.401G>C p.(Cys134Ser)                       | Novel                     |
| G33                                                | 18  | M   | Examination due to family history                                                   | HC, CAD        | No        | 8.8        | 7.2           | Missense Exon 4 c.552T>G p.(Cys184Trp)                      | Reported in LOVD database |
| G18                                                | 6   | M   | HC firstly detected in 3                                                            | HC, CAD        | No        | 10.7       | 8.6           | Missense Exon 4 c.616A>C p.(Ser206Arg)                      | Novel                     |
| G44                                                | 11  | M   | Sinus node dysfunction from age 7                                                   | HC             | No        | 7.5        | 5.7           | Missense Exon 6 c.938 G>A p.(Cys313Tyr)                     | rs875989910               |
| G21                                                | 19  | M   | HC firstly detected in 8                                                            | HC             | No        | 7.9        | 5.7           | spl Intron 6 c.940+1_c.940+4 delGTGA (g.18154_18157delGTGA) | Novel                     |
| G27                                                | 21  | F   | HC firstly detected in 19                                                           | HC             | No        | 8          | 3.7           | spl Intron 6 c.940+1_c.940+4 delGTGA (g.18154_18157delGTGA) | Novel                     |
| G32                                                | 19  | M   | Examination due to frequent respiratory infections                                  | No             | No        | 10         | Nd            | spl Intron 6 c.940+1_c.940+4 delGTGA (g.18154_18157delGTGA) | Novel                     |
| G41                                                | 7   | M   | HC firstly detected in 3 (cerebrovascular accident with subsequent hemiplegia)      | HC             | No        | 6.8        | 6.3           | spl Intron 6 c.940+1_c.940+4 delGTGA (g.18154_18157delGTGA) | Novel                     |
| G26                                                | 12  | M   | HC firstly detected in 10, additionally diagnosed with acute lymphoblastic leukemia | HC             | No        | 8.3        | 5.5           | spl Intron 8 c.1186+1G>T                                    | rs730880131               |
| G5                                                 | 5   | M   | HC firstly detected in 2, hepatomegaly                                              | HC             | No        | 9.1        | 7.2           | Missense Exon 9 c.1202T>A p.(Leu401His)                     | rs121908038               |
| G14                                                | 15  | F   | Dyspnea                                                                             | HC             | No        | 10.4       | 7.1           | Missense Exon 9 c.1202T>A p.(Leu401His)                     | rs121908038               |
| G30                                                | 7   | M   | HC firstly detected in 5                                                            | HC             | No        | 9.5        | 5.7           | Missense Exon 9 c.1277 T>C p.(Leu426Pro)                    | rs879254851               |
| G17                                                | 16  | F   | Examination due to frequent respiratory infections                                  | No             | No        | 9.6        | 5             | Frameshift Exon 11 c.1684_1691delTGGCCAA p.(Pro563Hisfs*14) | Novel                     |
| G3                                                 | 11  | F   | HC firstly detected in 3                                                            | HC             | No        | 8.9        | 5.7           | Missense Exon 12 c.1775G>A p.(Gly592Glu)                    | rs137929307               |
| G22                                                | 9   | F   | HC firstly detected in 6                                                            | HC, CAD        | No        | 10.2       | 6             | Missense Exon 12 c.1775G>A p.(Gly592Glu)                    | rs137929307               |
| G37                                                | 6   | F   | Examination due to frequent respiratory infections                                  | HC             | No        | Nd         | 6.9           | Missense Exon 12 c.1775G>A p.(Gly592Glu)                    | rs137929307               |
| G39                                                | 8   | M   | Examination due to family history                                                   | HC             | No        | 6.3        | 4.5           | Missense Exon 12 c.1775G>A p.(Gly592Glu)                    | rs137929307               |
| G49                                                | 6   | F   | Examination due to family history                                                   | HC             | No        | 8.5        | 6.6           | Missense Exon 12 c.1775G>A p.(Gly592Glu)                    | rs137929307               |
| G9                                                 | 17  | M   | Secondary cardiomyopathy, HC firstly detected in 12                                 | HC             | No        | 10.1       | 7.3           | Missense Exon 12 c.1730G>C p.(Trp577Ser)                    | rs138947766               |

Table SIII. Continued.

| B, Patients with mutations in the <i>APOB</i> gene                      |     |     |                                                          |                |           |            |               |                                            |             |
|-------------------------------------------------------------------------|-----|-----|----------------------------------------------------------|----------------|-----------|------------|---------------|--------------------------------------------|-------------|
| Patient ID                                                              | Age | Sex | Medical history if available                             | Family history | Xanthomas | TC, mmol/l | LDL-C, mmol/l | Mutation                                   | Variant ID  |
| G20                                                                     | 6   | M   | HC firstly detected in 4                                 | HC             | No        | 7.3        | 6.2           | Missense Exon 26 c.9175C>T p.(Arg3059Cys)  | rs146377316 |
| G24                                                                     | 7   | M   | Hepatosplenomegaly, additionally diagnosed with epilepsy | HC             | No        | 7.4        | 4.4           | Missense Exon 26 c.10580G>A p.(Arg3527Gln) | rs5742904   |
| C, Patient with mutation in the <i>ABCG8</i> gene                       |     |     |                                                          |                |           |            |               |                                            |             |
| Patient ID                                                              | Age | Sex | Medical history if available                             | Family history | Xanthomas | TC, mmol/l | LDL-C, mmol/l | Mutation                                   | Variant ID  |
| G40                                                                     | 2   | M   |                                                          | HC             | No        | 6.4        | Nd            | Missense Exon 7 c.1083G>A p.(Trp361*)      | rs137852987 |
| D, Patient with mutation in the <i>LIPA</i> gene                        |     |     |                                                          |                |           |            |               |                                            |             |
| Patient ID                                                              | Age | Sex | Medical history if available                             | Family history | Xanthomas | TC, mmol/l | LDL-C, mmol/l | Mutation                                   | Variant ID  |
| G48                                                                     | 11  | F   | Hepatomegaly                                             | HC             | No        | 7.9        | Nd            | sp1 Exon 8 c.894G>A (p.Q298=)              | rs116928232 |
| E, Patient with variant in the <i>PSCK9</i> gene (unknown significance) |     |     |                                                          |                |           |            |               |                                            |             |
| Patient ID                                                              | Age | Sex | Medical history if available                             | Family history | Xanthomas | TC, mmol/l | LDL-C, mmol/l | Mutation                                   | Variant ID  |
| G34                                                                     | 8   | F   | Congenital heart defect, HC first detected in 4          | HC             | No        | 7.1        | 4.7           | Missense c.1486C>T p.(Arg496Trp)           | rs374603772 |

ASCVD, atherosclerotic cardiovascular disease; CAD, coronary artery disease; HC, hypercholesterolemia; LDL-C, low density lipoprotein cholesterol; LOVD, Leiden Open Variation Database; Nd, not determined; TC, total cholesterol; F, female; M, male.
